# Supplementary material for: A ratiometric and colorimetric probe for detecting Hg2+ based on naphthalimide–rhodamine and its staining function in cell imaging
Source: Royal Society of Chemistry journal article supplement (doi:10.1039/c9ra01459d), 2019-01-01
Supplement: c9ra01459d1.pdf [file c9ra01459d1.pdf]

## *Supporting information*

### **A ratiometric and colorimetric probe for detecting Hg<sup>2+</sup> based on naphthalimide-rhodamine and its staining function in cell imaging**

Yuesong Wang, Haichang Ding, Shuai Wang, Congbin Fan, Yayi Tu, Gang Liu\*, Shouzhi Pu\*

Jiangxi Key Laboratory of Organic Chemistry, Jiangxi Science & Technology Normal University, Nanchang 330013, PR China

\*Corresponding author: [liugang0926@163.com](mailto:liugang0926@163.com)(G. Liu); [pushouzhi@tsinghua.org.cn](mailto:pushouzhi@tsinghua.org.cn)

### **Contents**

#### *Cell culture and imaging*

In light of good cellular permeability of probe **1**, the probe was applied to cell staining. The fluorescence images were taken by an OLYMPUS FV1000 confocal laser scanning microscope. HeLa cells (human cervical cancer cell) were cultured in cell staining (Dulbecco modified Eagle's medium) supplemented with 10% FBS (fetal bovine serum) in an atmosphere of 5% CO<sub>2</sub> and 95% air at 37 °C overnight. Before the cell staining, the cells of DMEM were washed three times with phosphate-buffered saline (PBS). Subsequently, the cells were incubated with probe **1** (20 μM) in the culture medium for 30 min and washed with PBS three times.

**Fig. S1.** <sup>1</sup>H NMR spectrum of **7** in CD<sub>2</sub>Cl<sub>2</sub>.

**Fig. S2.** <sup>13</sup>C NMR spectrum of probe **7** in CD<sub>2</sub>Cl<sub>2</sub>.

**Fig. S3.** The ESI-MS spectrum of **7**.

**Fig. S4.** <sup>1</sup>H NMR spectrum of **1** in CD<sub>2</sub>Cl<sub>2</sub>.

**Fig. S5.** <sup>13</sup>C NMR spectrum of probe **1** in CD<sub>2</sub>Cl<sub>2</sub>.

**Fig. S6.** The ESI-MS spectrum of **1**.

**Fig. S7.** (A) Nonlinear curve fitting of the fluorescence titration data from 0-21 μM for **1** with Hg<sup>2+</sup> at 604 nm in CH<sub>3</sub>CN-H<sub>2</sub>O (7/3, v/v) solution at room temperature; (B) The limit of detection (LOD) of **1** towards Hg<sup>2+</sup> by fluorescence measured at 604 nm.

**Fig. S8.** (A) Nonlinear curve fitting of change of absorbance from 0-70 μM for **1** with Hg<sup>2+</sup> in CH<sub>3</sub>CN-H<sub>2</sub>O (7/3, v/v) solution at room temperature; (B) The limit of detection (LOD) of change of absorbance of probe **1** towards Hg<sup>2+</sup> by UV-vis measured.

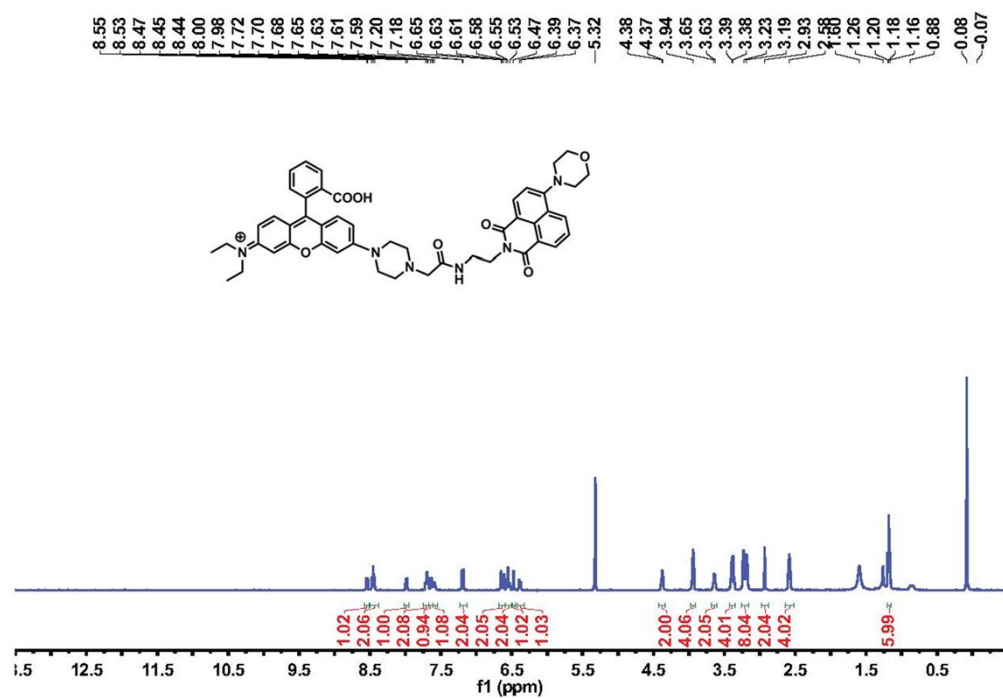

Fig. S1.

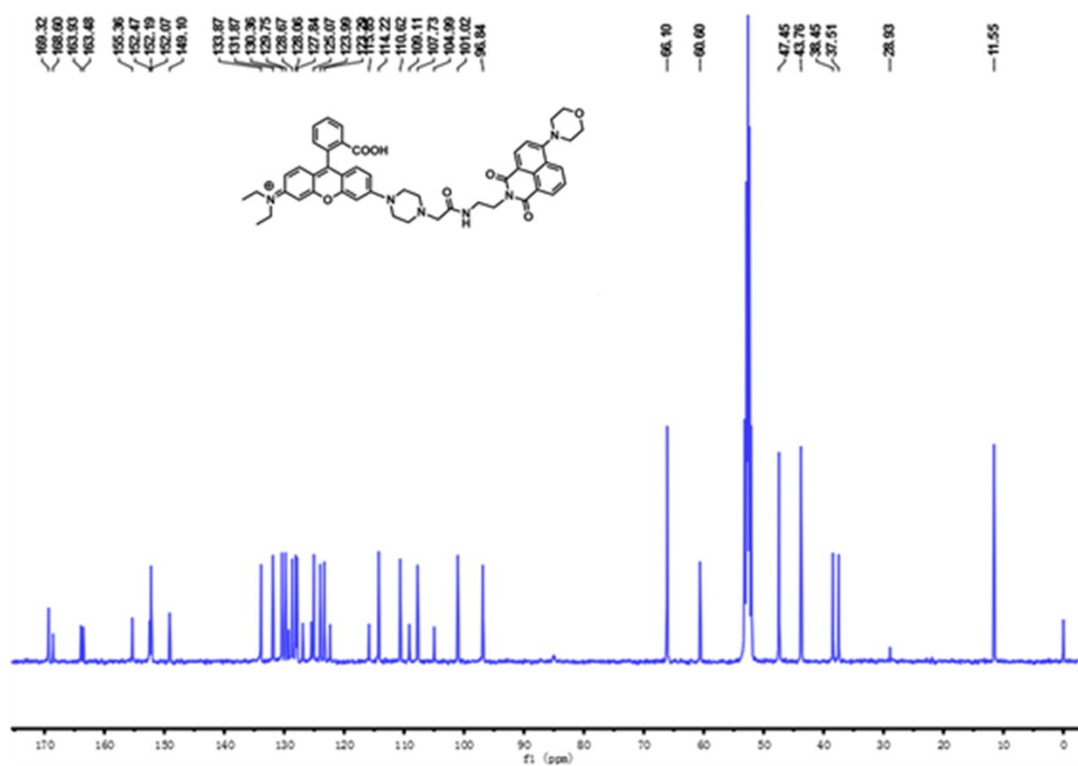

Fig. S2.

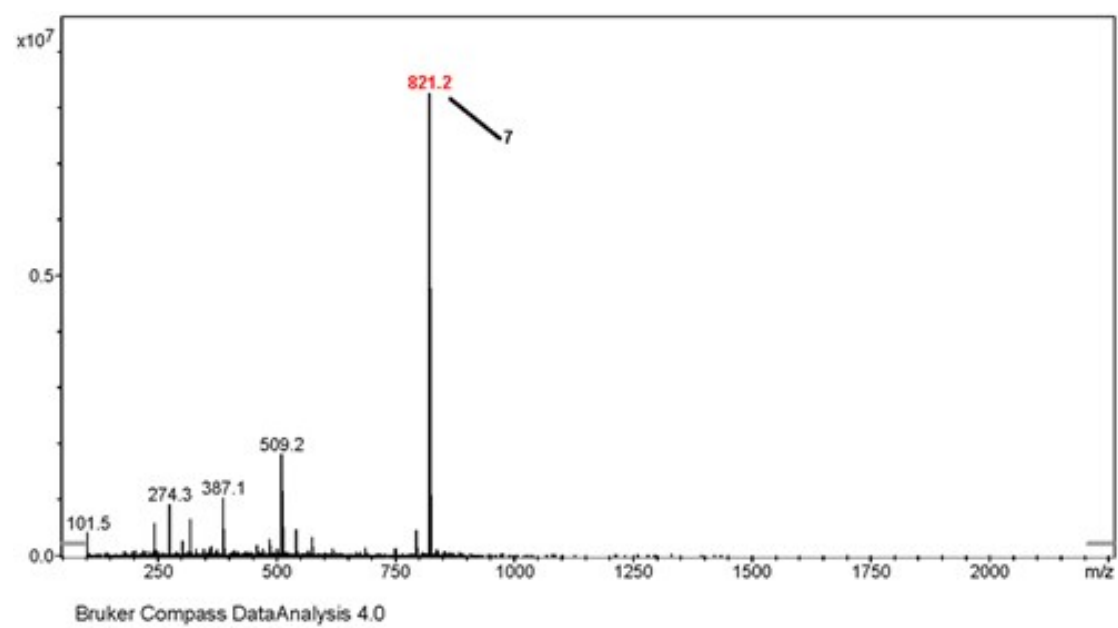

Fig. S3

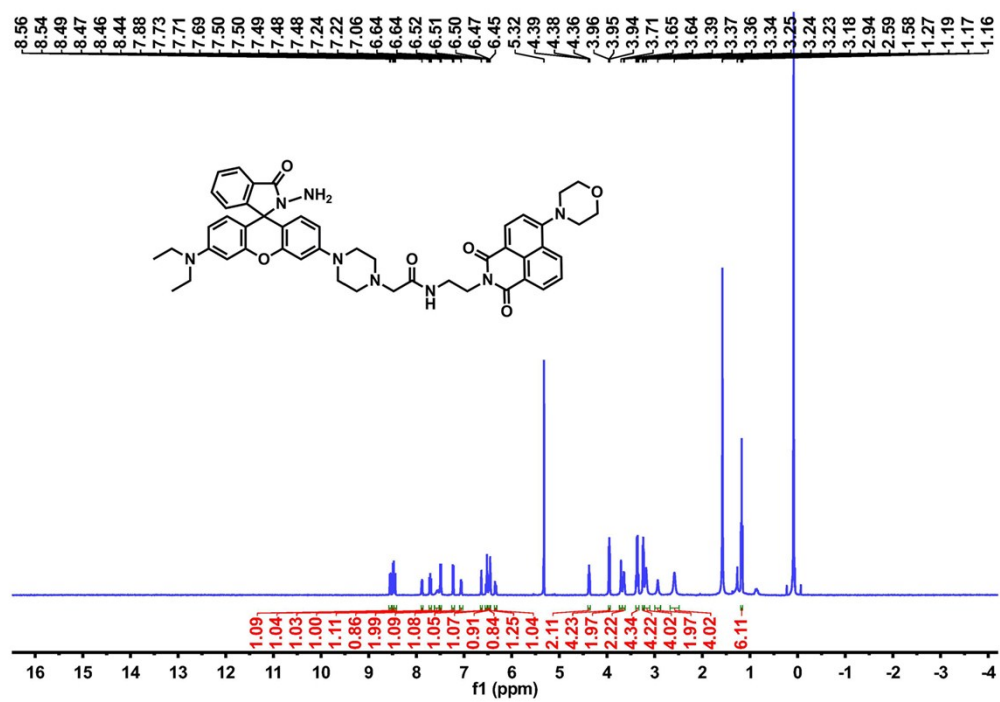

Fig. S4

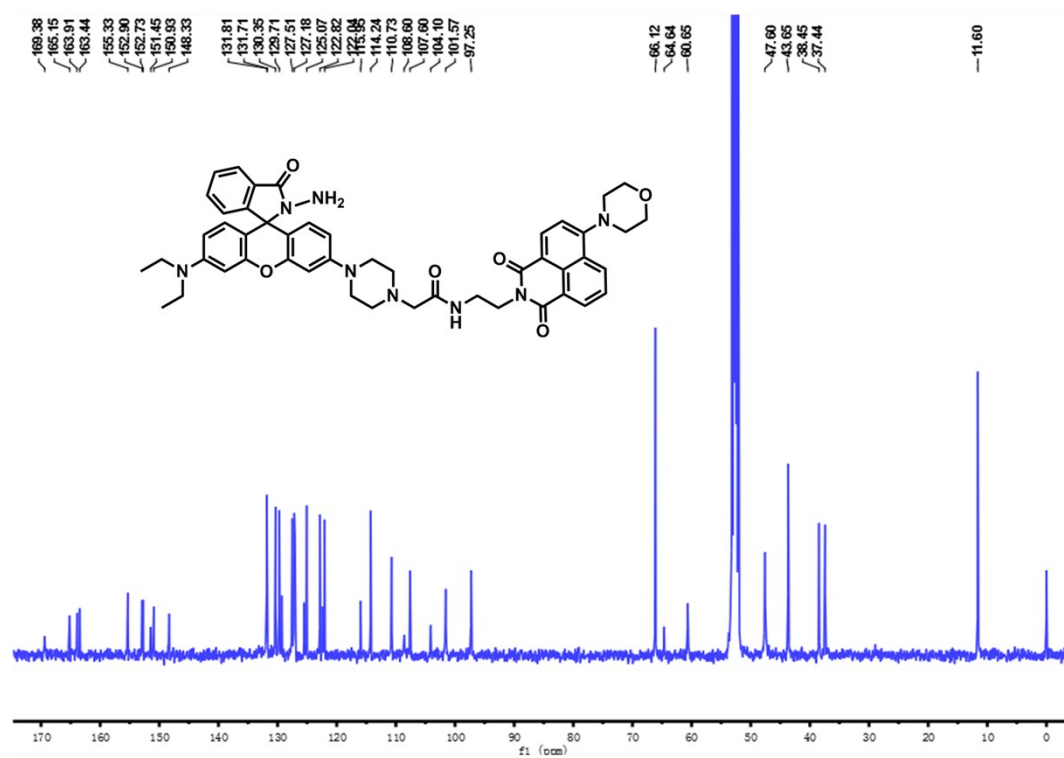

Fig. S5

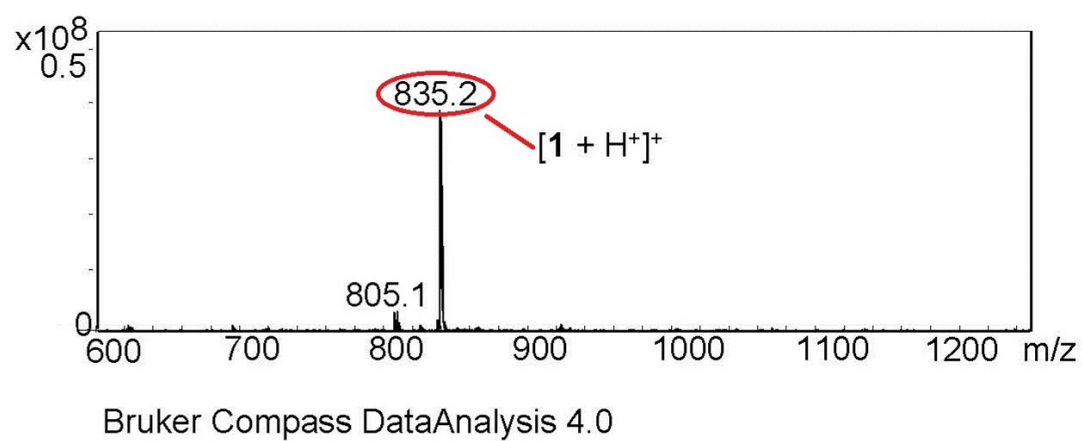

**Fig. S6**

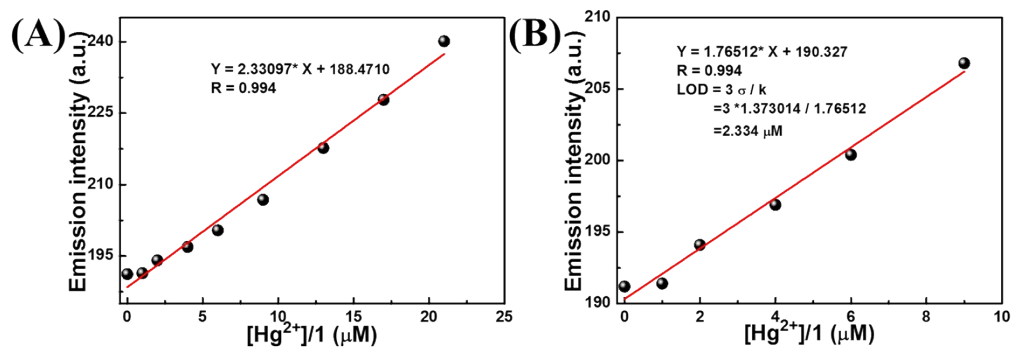

Fig. S7

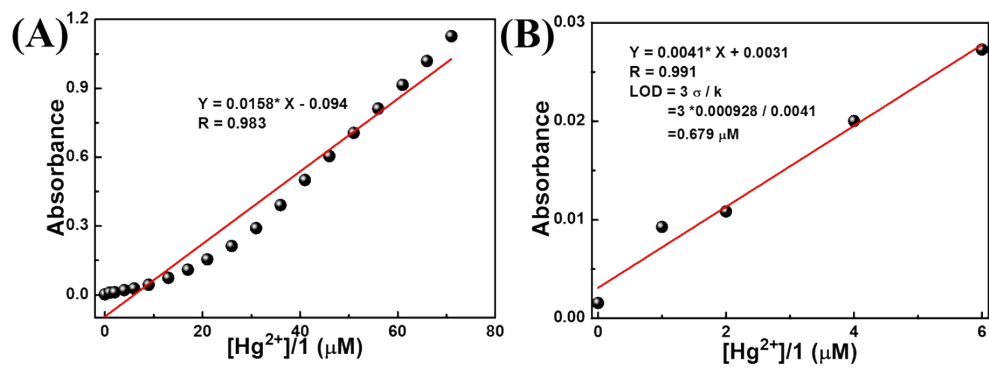

Fig. S8
